# Supplementary material for: Multidecadal Trend Analysis of Armenian Mountainous Grassland and Its Relationship to Climate Change Using Multi-Sensor NDVI Time-Series
Source: MDPI journal article supplement (doi:10.3390/geosciences12110412), 2022-11-10
Supplement: s1 [file s1]

**Table S1.** The correlation between 10-days values of precipitation and SR NDVI for Meghri (significance level: \*-  $p < 0.05$ , \*\*  $p < 0.01$ ).

|        | 1P    | 2P     | 3P      | 4P     | 5P     | 6P    | 7P     | 8P    | 9P    | 10P   | 11P   | 12P   | 13P   | 14P   | 15P    | 16P    | 17P    | 18P   | 19P    | 20P   | 21P    |
|--------|-------|--------|---------|--------|--------|-------|--------|-------|-------|-------|-------|-------|-------|-------|--------|--------|--------|-------|--------|-------|--------|
| 1NDVI  | -.424 |        |         |        |        |       |        |       |       |       |       |       |       |       |        |        |        |       |        |       |        |
| 2NDVI  | -.233 | -.137  |         |        |        |       |        |       |       |       |       |       |       |       |        |        |        |       |        |       |        |
| 3NDVI  | -.215 | -.060  | -.703** |        |        |       |        |       |       |       |       |       |       |       |        |        |        |       |        |       |        |
| 4NDVI  | -.468 | .498*  | -.462   | -.034  |        |       |        |       |       |       |       |       |       |       |        |        |        |       |        |       |        |
| 5NDVI  | -.230 | .297   | .377    | -.048  | .115   |       |        |       |       |       |       |       |       |       |        |        |        |       |        |       |        |
| 6NDVI  | -.068 | -.044  | .461    | .722** | .644** | -.023 |        |       |       |       |       |       |       |       |        |        |        |       |        |       |        |
| 7NDVI  | .082  | .390   | .342    | .115   | .437   | .464  | -.157  |       |       |       |       |       |       |       |        |        |        |       |        |       |        |
| 8NDVI  | -.046 | .152   | .170    | .454   | .452   | .444  | .337   | .159  |       |       |       |       |       |       |        |        |        |       |        |       |        |
| 9NDVI  | .236  | .318   | .316    | .102   | .304   | .585* | .305   | .175  | -.233 |       |       |       |       |       |        |        |        |       |        |       |        |
| 10NDVI | .061  | .100   | .209    | .463   | .456   | .559* | .485*  | .106  | -.038 | -.431 |       |       |       |       |        |        |        |       |        |       |        |
| 11NDVI | -.230 | -.025  | .132    | .284   | .441   | .543* | .487*  | .355  | .209  | .179  | -.180 |       |       |       |        |        |        |       |        |       |        |
| 12NDVI | .062  | .017   | .062    | .122   | .263   | .315  | .091   | .355  | -.266 | -.158 | -.148 | -.274 |       |       |        |        |        |       |        |       |        |
| 13NDVI | -.289 | .552*  | -.083   | .288   | .385   | -.128 | .158   | -.164 | -.251 | -.171 | -.179 | .287  | .192  |       |        |        |        |       |        |       |        |
| 14NDVI | -.361 | .069   | -.063   | .436   | .420   | .464  | .529*  | .293  | -.021 | -.155 | -.143 | -.008 | .119  | -.168 |        |        |        |       |        |       |        |
| 15NDVI | -.106 | .089   | -.133   | -.264  | .154   | .133  | -.041  | -.050 | .261  | .280  | -.033 | .309  | .347  | -.209 | -.517* |        |        |       |        |       |        |
| 16NDVI | -.012 | .527*  | .380    | .095   | .215   | .292  | .153   | .054  | -.241 | -.380 | -.015 | -.084 | .260  | .065  | .332   | -.545* |        |       |        |       |        |
| 17NDVI | -.125 | .144   | -.315   | .145   | .080   | .211  | -.038  | .025  | -.008 | -.110 | -.046 | -.318 | .272  | -.118 | .437   | .000   | -.573* |       |        |       |        |
| 18NDVI | -.349 | .768** | .097    | .072   | .089   | .366  | -.246  | -.408 | .277  | -.242 | -.044 | .285  | .112  | -.332 | .375   | -.077  | -.035  | -.448 |        |       |        |
| 19NDVI | -.215 | .083   | -.235   | .000   | -.199  | .027  | .684** | .110  | .193  | .206  | -.226 | -.061 | .260  | .355  | .050   | .032   | .401   | .394  | -.558* |       |        |
| 20NDVI | -.094 | .235   | .095    | -.331  | -.279  | .257  | .124   | .140  | .417  | .392  | .018  | .052  | -.243 | .250  | .147   | .320   | .590*  | .380  | -.242  | -.090 |        |
| 21NDVI | .157  | .150   | .254    | .208   | .245   | .222  | .201   | .106  | .147  | -.029 | -.011 | .086  | -.250 | .315  | -.149  | -.197  | .237   | .055  | .064   | .009  | -.542* |

**Table S2.** The correlation between 10-days values of temperature and SR NDVI for Meghri (significance level: \*-  $p < 0.05$ , \*\*  $p < 0.01$ )

|        | 1T    | 2T     | 3T      | 4T     | 5T    | 6T     | 7T    | 8T    | 9T    | 10T    | 11T   | 12T     | 13T   | 14T    | 15T    | 16T   | 17T    | 18T    | 19T   | 20T   | 21T   |
|--------|-------|--------|---------|--------|-------|--------|-------|-------|-------|--------|-------|---------|-------|--------|--------|-------|--------|--------|-------|-------|-------|
| 1NDVI  | .333  |        |         |        |       |        |       |       |       |        |       |         |       |        |        |       |        |        |       |       |       |
| 2NDVI  | .034  | .505*  |         |        |       |        |       |       |       |        |       |         |       |        |        |       |        |        |       |       |       |
| 3NDVI  | .210  | .240   | .572*   |        |       |        |       |       |       |        |       |         |       |        |        |       |        |        |       |       |       |
| 4NDVI  | -.022 | -.309  | -.183   | .436   |       |        |       |       |       |        |       |         |       |        |        |       |        |        |       |       |       |
| 5NDVI  | .487* | -.431  | -.608** | -.428  | .259  |        |       |       |       |        |       |         |       |        |        |       |        |        |       |       |       |
| 6NDVI  | -.211 | .146   | -.242   | -.578* | -.161 | -.035  |       |       |       |        |       |         |       |        |        |       |        |        |       |       |       |
| 7NDVI  | -.059 | -.159  | -.443   | -.171  | -.151 | -.240  | .248  |       |       |        |       |         |       |        |        |       |        |        |       |       |       |
| 8NDVI  | -.143 | -.033  | -.315   | -.074  | -.027 | -.154  | -.091 | .397  |       |        |       |         |       |        |        |       |        |        |       |       |       |
| 9NDVI  | .060  | -.361  | -.568*  | -.217  | -.111 | -.368  | -.134 | .104  | .122  |        |       |         |       |        |        |       |        |        |       |       |       |
| 10NDVI | -.049 | -.260  | -.381   | -.323  | -.098 | -.414  | -.310 | -.030 | -.266 | .709** |       |         |       |        |        |       |        |        |       |       |       |
| 11NDVI | .098  | -.179  | -.202   | -.166  | .241  | -.516* | -.283 | -.053 | -.160 | .110   | .437  |         |       |        |        |       |        |        |       |       |       |
| 12NDVI | -.124 | .041   | -.175   | .044   | -.081 | .284   | .084  | .490* | .117  | .460   | -.056 | .346    |       |        |        |       |        |        |       |       |       |
| 13NDVI | -.278 | -.309  | -.276   | .002   | .073  | .101   | -.171 | .063  | .235  | -.024  | -.187 | -.656** | .342  |        |        |       |        |        |       |       |       |
| 14NDVI | -.096 | .052   | -.100   | .013   | .443  | -.140  | -.051 | .167  | .097  | .336   | -.086 | -.266   | .024  | .627** |        |       |        |        |       |       |       |
| 15NDVI | .123  | -.211  | .048    | .179   | .133  | -.230  | -.302 | -.352 | -.342 | -.572* | -.195 | -.676** | -.380 | -.239  | .678** |       |        |        |       |       |       |
| 16NDVI | -.088 | -.562* | -.688** | -.183  | .073  | -.291  | -.131 | .142  | .163  | .403   | .229  | -.382   | -.030 | -.082  | -.232  | .552* |        |        |       |       |       |
| 17NDVI | -.129 | .120   | .146    | .057   | .092  | .415   | .078  | .520* | .137  | .430   | -.140 | .164    | .213  | .382   | -.210  | .255  | .615** |        |       |       |       |
| 18NDVI | .108  | -.284  | -.440   | -.105  | -.025 | -.085  | .349  | .588* | .182  | -.041  | -.196 | -.537*  | -.040 | .267   | -.021  | .337  | -.259  | .516*  |       |       |       |
| 19NDVI | .216  | -.395  | -.142   | -.153  | .303  | .070   | -.430 | -.258 | -.351 | -.147  | -.045 | -.213   | -.281 | -.216  | -.244  | -.416 | -.303  | -.601* | .318  |       |       |
| 20NDVI | .274  | -.412  | -.342   | .047   | .113  | -.323  | .054  | .069  | .098  | -.377  | -.007 | -.124   | -.439 | -.306  | -.304  | -.277 | -.458  | -.119  | .359  | .239  |       |
| 21NDVI | -.358 | -.427  | -.468   | .205   | -.239 | -.519* | -.358 | -.029 | -.346 | -.102  | .178  | -.381   | -.178 | -.401  | -.335  | -.196 | -.125  | .203   | -.019 | .508* | .518* |

**Table S3.** The correlation between 10-days values of precipitation and SR NDVI for Sisian (significance level: \*-  $p < 0.05$ , \*\*  $p < 0.01$ )

|        | 1P     | 2P     | 3P     | 4P     | 5P     | 6P    | 7P    | 8P    | 9P     | 10P    | 11P   | 12P    | 13P   | 14P   | 15P   | 16P    | 17P   | 18P    | 19P   | 20P    | 21P   |
|--------|--------|--------|--------|--------|--------|-------|-------|-------|--------|--------|-------|--------|-------|-------|-------|--------|-------|--------|-------|--------|-------|
| 1NDVI  | -.577* |        |        |        |        |       |       |       |        |        |       |        |       |       |       |        |       |        |       |        |       |
| 2NDVI  | -.250  | -.587* |        |        |        |       |       |       |        |        |       |        |       |       |       |        |       |        |       |        |       |
| 3NDVI  | -.212  | -.211  | -.466  |        |        |       |       |       |        |        |       |        |       |       |       |        |       |        |       |        |       |
| 4NDVI  | -.521* | .158   | -.552* | -.270  |        |       |       |       |        |        |       |        |       |       |       |        |       |        |       |        |       |
| 5NDVI  | -.461  | -.124  | .377   | -.261  | -.319  |       |       |       |        |        |       |        |       |       |       |        |       |        |       |        |       |
| 6NDVI  | .383   | -.491* | -.030  | .629** | .284   | -.265 |       |       |        |        |       |        |       |       |       |        |       |        |       |        |       |
| 7NDVI  | -.553* | .036   | .108   | .041   | -.018  | .093  | -.202 |       |        |        |       |        |       |       |       |        |       |        |       |        |       |
| 8NDVI  | .152   | .055   | -.181  | .383   | .435   | .245  | .065  | -.477 |        |        |       |        |       |       |       |        |       |        |       |        |       |
| 9NDVI  | -.472  | .409   | .220   | -.493  | -.183  | .325  | .116  | .085  | -.084  |        |       |        |       |       |       |        |       |        |       |        |       |
| 10NDVI | .238   | .171   | -.137  | .264   | .465   | .465  | .497* | .044  | .119   | .143   |       |        |       |       |       |        |       |        |       |        |       |
| 11NDVI | -.163  | -.059  | .177   | -.015  | .147   | .219  | .106  | .299  | .437   | .529*  | -.116 |        |       |       |       |        |       |        |       |        |       |
| 12NDVI | .297   | .133   | -.198  | .299   | .311   | .115  | .152  | -.352 | .392   | -.016  | .548* | -.064  |       |       |       |        |       |        |       |        |       |
| 13NDVI | -.202  | .109   | -.382  | -.042  | .270   | .504* | .140  | .367  | .499*  | .341   | .221  | .046   | -.042 |       |       |        |       |        |       |        |       |
| 14NDVI | -.298  | .043   | -.173  | .266   | .312   | .144  | -.062 | .231  | .736** | .701** | .501* | .240   | -.169 | -.313 |       |        |       |        |       |        |       |
| 15NDVI | -.133  | .325   | -.352  | -.418  | -.187  | .480  | -.084 | .474  | .420   | .647** | -.182 | .055   | .120  | -.101 | -.415 |        |       |        |       |        |       |
| 16NDVI | .270   | .529*  | .359   | -.288  | -.291  | -.014 | .280  | -.259 | -.173  | -.104  | -.062 | .062   | .054  | .415  | .516* | -.545* |       |        |       |        |       |
| 17NDVI | .398   | .255   | -.387  | .232   | .340   | -.201 | .257  | .068  | .111   | .117   | .089  | .180   | -.424 | .534* | .060  | .419   | -.407 |        |       |        |       |
| 18NDVI | .093   | .205   | .156   | .167   | .390   | .057  | -.331 | -.172 | .388   | .201   | .477  | -.122  | -.221 | .118  | .243  | -.048  | -.312 | -.543* |       |        |       |
| 19NDVI | -.115  | .322   | -.139  | -.385  | -.526* | -.087 | .396  | .414  | .128   | .176   | -.063 | .642** | .375  | .209  | -.398 | -.212  | .412  | .055   | -.444 |        |       |
| 20NDVI | .015   | .288   | .189   | .030   | -.011  | .157  | .069  | .083  | .545*  | .467   | .178  | .528*  | .492* | -.001 | -.087 | -.366  | .308  | .090   | -.314 | -.592* |       |
| 21NDVI | -.020  | .349   | .111   | .105   | .397   | .328  | .042  | -.152 | .402   | .308   | -.186 | .213   | .328  | .314  | .089  | .099   | .267  | .158   | -.056 | -.243  | -.330 |

**Table S4.** The correlation between 10-days values of temperature and SR NDVI for Sisian (significance level: \*-  $p < 0.05$ , \*\*  $p < 0.01$ )

|        | 1T     | 2T     | 3T      | 4T    | 5T    | 6T      | 7T     | 8T    | 9T      | 10T     | 11T   | 12T     | 13T     | 14T     | 15T   | 16T   | 17T    | 18T    | 19T   | 20T  | 21T  |
|--------|--------|--------|---------|-------|-------|---------|--------|-------|---------|---------|-------|---------|---------|---------|-------|-------|--------|--------|-------|------|------|
| 1NDVI  | .627** |        |         |       |       |         |        |       |         |         |       |         |         |         |       |       |        |        |       |      |      |
| 2NDVI  | .172   | .508*  |         |       |       |         |        |       |         |         |       |         |         |         |       |       |        |        |       |      |      |
| 3NDVI  | .277   | .444   | .690**  |       |       |         |        |       |         |         |       |         |         |         |       |       |        |        |       |      |      |
| 4NDVI  | .145   | -.123  | .097    | .345  |       |         |        |       |         |         |       |         |         |         |       |       |        |        |       |      |      |
| 5NDVI  | .705** | .001   | -.350   | -.227 | .478  |         |        |       |         |         |       |         |         |         |       |       |        |        |       |      |      |
| 6NDVI  | -.496* | .432   | .361    | -.227 | .000  | .213    |        |       |         |         |       |         |         |         |       |       |        |        |       |      |      |
| 7NDVI  | .575*  | .240   | -.095   | -.021 | .412  | -.229   | .706** |       |         |         |       |         |         |         |       |       |        |        |       |      |      |
| 8NDVI  | -.015  | .223   | .039    | .009  | -.086 | .083    | .212   | .461  |         |         |       |         |         |         |       |       |        |        |       |      |      |
| 9NDVI  | .216   | -.438  | -.595*  | .285  | .155  | -.393   | .264   | -.154 | .295    |         |       |         |         |         |       |       |        |        |       |      |      |
| 10NDVI | -.148  | -.211  | -.187   | -.297 | -.264 | -.394   | -.450  | -.074 | -.637** | .245    |       |         |         |         |       |       |        |        |       |      |      |
| 11NDVI | -.068  | -.177  | -.030   | -.010 | -.113 | -.607** | -.328  | -.361 | -.181   | -.308   | .414  |         |         |         |       |       |        |        |       |      |      |
| 12NDVI | -.078  | .183   | .118    | .123  | -.248 | .357    | .127   | .427  | -.094   | -.017   | -.266 | .187    |         |         |       |       |        |        |       |      |      |
| 13NDVI | -.058  | -.158  | -.114   | .049  | .336  | -.075   | -.337  | -.083 | -.420   | -.193   | -.192 | -.646** | -.313   |         |       |       |        |        |       |      |      |
| 14NDVI | .167   | .250   | .213    | .112  | .113  | -.072   | .141   | .251  | -.124   | -.289   | -.128 | -.203   | -.113   | .170    |       |       |        |        |       |      |      |
| 15NDVI | .094   | -.197  | .035    | .123  | .000  | -.088   | -.294  | -.464 | -.423   | -.684** | -.198 | -.487*  | -.622** | -.500*  | .532* |       |        |        |       |      |      |
| 16NDVI | .052   | -.515* | -.802** | -.307 | .046  | .168    | -.038  | .429  | -.113   | .069    | .004  | -.428   | -.097   | -.299   | -.462 | .364  |        |        |       |      |      |
| 17NDVI | -.216  | .212   | .229    | .031  | -.248 | .462    | -.149  | .293  | -.233   | .085    | -.247 | .092    | .280    | .064    | -.077 | -.161 | .710** |        |       |      |      |
| 18NDVI | -.071  | .055   | -.256   | .001  | -.155 | .120    | .315   | .458  | .080    | -.099   | -.327 | -.293   | .118    | .250    | -.049 | .244  | .064   | .576*  |       |      |      |
| 19NDVI | .058   | -.245  | -.157   | .097  | .224  | .298    | -.229  | -.070 | -.247   | -.317   | -.122 | -.041   | -.114   | -.568*  | -.042 | -.405 | -.051  | -.593* | -.149 |      |      |
| 20NDVI | -.103  | -.270  | -.257   | -.046 | -.227 | -.140   | -.193  | .096  | -.411   | -.459   | .089  | -.246   | -.524*  | -.638** | -.216 | -.373 | -.218  | -.052  | .036  | .333 |      |
| 21NDVI | -.452  | -.372  | -.349   | .272  | -.218 | -.270   | -.332  | .204  | -.286   | -.145   | -.083 | -.565*  | -.200   | -.301   | -.352 | -.253 | -.115  | .002   | -.102 | .096 | .110 |











**Table S9.** Trend analysis based on LANDSAT NDVI time series.

| Study area | Time series  | MK      |          |          | MMKH    |          |          | MMKY      |          |          | PW      |          |          | TF PW   |          |          | Sen's slope | Trend                  |
|------------|--------------|---------|----------|----------|---------|----------|----------|-----------|----------|----------|---------|----------|----------|---------|----------|----------|-------------|------------------------|
|            |              | P       | Z        | Tau      | P       | Z        | Tau      | P         | Z        | Tau      | P       | Z        | Tau      | P       | Z        | Tau      |             |                        |
| Meghri     | April        | 0.04729 | 1.98374  | 0.28     | 0.00017 | 3.75712  | 0.28     | 0.000003  | 4.64521  | 0.28     | 0.07984 | 1.75162  | 0.25333  | 0.07212 | 1.79833  | 0.26     | 0.00372     | Significant increasing |
|            | May          | 0.01525 | 2.42638  | 0.31494  | 0.00153 | 2.42638  | 0.31494  | 0         | 8.44223  | 0.314943 | 0.07475 | 1.78201  | 0.23645  | 0.03733 | 2.08214  | 0.27586  | 0.00217     | Significant increasing |
|            | June         | 0.39559 | 0.84953  | 0.11640  | 0.23281 | 1.19314  | 0.11640  | 0.01227   | 2.50437  | 0.116402 | 0.80246 | 0.25016  | 0.03704  | 0.64650 | 0.45863  | 0.06553  | 0.00059     | No trend               |
|            | July         | 0.59822 | 0.52697  | 0.06882  | 0.63648 | 0.47262  | 0.06882  | 0.13588   | 1.49131  | 0.068817 | 0.61739 | 0.49955  | 0.06667  | 0.54412 | 0.60659  | 0.08046  | 0.0004      | No trend               |
|            | August       | 0.23415 | 1.18975  | 0.15269  | 0.10030 | 1.64338  | 0.15269  | 0.00125   | 3.22684  | 0.152688 | 0.47545 | 0.71364  | 0.09425  | 0.30077 | 1.03478  | 0.13563  | 0.00044     | No trend               |
|            | September    | 0.29184 | 1.05408  | 0.13548  | 0.29185 | 1.05408  | 0.13548  | 0.00873   | 2.62261  | 0.135484 | 0.47545 | 0.71364  | 0.09425  | 0.47545 | 0.71364  | 0.09425  | 0.00033     | No trend               |
|            | October      | 0.08958 | 1.69761  | 0.24     | 0.08958 | 1.69761  | 0.24     | 0.00007   | 3.98471  | 0.24     | 0.18311 | 0.33123  | 0.19333  | 0.12899 | 1.51807  | 0.22     | 0.00086     | No trend               |
|            | Spring       | 0.01434 | 2.44868  | 0.30645  | 0.01434 | 2.44868  | 0.30645  | 0.0000003 | 5.07979  | 0.306452 | 0.01439 | 2.44748  | 0.31183  | 0.00531 | 2.78741  | 0.35484  | 0.00243     | Significant increasing |
|            | Summer       | 0.34458 | 0.94516  | 0.11742  | 0.17224 | 1.36503  | 0.11742  | 0.01651   | 2.39753  | 0.117424 | 0.88396 | 0.14595  | 0.02016  | 0.75799 | 0.30811  | 0.04032  | 0.00038     | No trend               |
|            | Autumn       | 0.14003 | 1.47570  | 0.18548  | 0.14003 | 1.47570  | 0.18548  | 0.00101   | 3.28665  | 0.185484 | 0.39542 | 0.84982  | 0.10968  | 0.24778 | 2.52559  | 0.14839  | 0.00048     | No trend               |
|            | Humid period | 0.04378 | 2.01612  | 0.24421  | 0.04379 | 2.01612  | 0.24421  | 0.00002   | 4.20378  | 0.244207 | 0.02466 | 2.24669  | 0.27651  | 0.01155 | 1.05407  | 0.31061  | 0.00136     | Significant increasing |
|            | Dry period   | 0.49534 | 0.68184  | 0.08523  | 0.32516 | 0.98391  | 0.08523  | 0.08433   | 1.7261   | 0.085227 | 0.42684 | 0.79461  | 0.10081  | 0.29185 | 0.62035  | 0.13306  | 0.00040     | No trend               |
| Sisian     | April        | 0.45961 | 0.73949  | 0.11463  | 0.45961 | 0.73949  | 0.11463  | 0.00874   | 2.622    | 0.114625 | 0.49856 | 0.67675  | 0.10822  | 0.53502 | 0.62035  | 0.09957  | 0.00259     | No trend               |
|            | May          | 0.11012 | 1.59766  | 0.20430  | 0.02123 | 2.30384  | 0.20430  | 0.00008   | 3.94127  | 0.204301 | 0.16404 | 1.3916   | 0.18161  | 0.16404 | 1.3916   | 0.18161  | 0.00162     | No trend               |
|            | June         | 0.26193 | 1.12176  | 0.14409  | 0.28225 | 1.07528  | 0.14409  | 0.00387   | 2.88878  | 0.144086 | 0.19895 | 1.28455  | 0.16782  | 0.09353 | 1.67706  | 0.21839  | 0.00175     | No trend               |
|            | July         | 0.91363 | -0.10850 | -0.01515 | 0.91363 | -0.10846 | -0.01515 | 0.84126   | -0.20028 | -0.01515 | 0.98706 | -0.01622 | -0.00403 | 0.98706 | -0.01622 | -0.00403 | -0.00014    | No trend               |
|            | August       | 0.45856 | -0.74122 | -0.09091 | 0.45856 | -0.74122 | -0.09091 | 0.1628    | -1.39556 | -0.09091 | 0.63099 | -0.48033 | -0.06061 | 0.54566 | -0.60428 | -0.07576 | -0.00007    | No trend               |
|            | September    | 0.39008 | -0.85947 | -0.10887 | 0.39008 | -0.85947 | -0.10887 | 0.03963   | -2.05756 | -0.10887 | 0.61013 | -0.50989 | -0.06667 | 0.65856 | -0.44191 | -0.05806 | -0.00058    | No trend               |
|            | October      | 0.56090 | 0.5815   | 0.07882  | 0.12553 | 1.53196  | 0.07882  | 0.01061   | 2.55543  | 0.078818 | 0.51442 | 0.65196  | 0.08995  | 0.62137 | 0.49391  | 0.06898  | 0.00067     | No trend               |
|            | Spring       | 0.22390 | 1.21623  | 0.15323  | 0.22390 | 1.21623  | 0.15323  | 0.00009   | 3.91593  | 0.153226 | 0.29198 | 1.05377  | 0.13548  | 0.41460 | 0.81583  | 0.10538  | 0.00145     | No trend               |
|            | Summer       | 0.74432 | 0.32614  | 0.04099  | 0.74432 | 0.32614  | 0.04099  | 0.48019   | 0.70599  | 0.040998 | 0.88909 | 0.13945  | 0.01895  | 0.86466 | 0.17044  | 0.02273  | 0.00029     | No trend               |
|            | Autumn       | 0.93825 | -0.07747 | -0.01136 | 0.88545 | -0.14411 | -0.01136 | 0.80212   | -0.2506  | -0.01136 | 0.78279 | 0.27568  | 0.03629  | 0.75799 | 0.30811  | 0.04032  | -0.0001     | No trend               |
|            | Humid period | 0.14103 | 1.47197  | 0.18182  | 0.14103 | 1.47197  | 0.18182  | 0.00003   | 4.18204  | 0.181818 | 0.21179 | 1.24866  | 0.15726  | 0.22390 | 1.21623  | 0.15323  | 0.00161     | No trend               |
|            | Dry period   | 0.78959 | -0.26684 | -0.03387 | 0.78959 | -0.26684 | -0.03387 | 0.57053   | -0.56727 | -0.03387 | 0.67569 | 0.41835  | 0.05303  | 0.72156 | 0.35637  | 0.04545  | -0.00024    | No trend               |
